# Supplementary material for: Novel aggrecan variant, p. Gln2364Pro, causes severe familial nonsyndromic adult short stature and poor growth hormone response in Chinese children
Source: PubMed Central journal article supplement (PMC5956957; doi:10.1186/s12881-018-0591-z), 2018-05-16
Supplement: 12881_2018_591_MOESM1_ESM.pdf [file 12881_2018_591_MOESM1_ESM.pdf]

|                               |   |   |   |   |   |   |   |   |   |   |   |   |   |   |   |   |   |   |   |   |   |
|-------------------------------|---|---|---|---|---|---|---|---|---|---|---|---|---|---|---|---|---|---|---|---|---|
| <i>Homo sapiens</i>           | E | Q | Q | S | H | L | S | S | I | V | T | P | E | E | Q | E | F | V | N | N | N |
| <i>Chimp</i>                  | E | Q | Q | S | H | L | S | S | I | V | T | P | E | E | Q | E | F | V | N | N | N |
| <i>Gorilla</i>                | E | Q | Q | S | H | L | S | S | I | V | T | P | E | E | Q | E | F | V | N | N | N |
| <i>Orangutan</i>              | E | Q | Q | S | H | L | S | S | I | V | T | P | E | E | Q | E | F | V | N | N | N |
| <i>Gibbon</i>                 | E | Q | Q | S | H | L | S | S | I | V | T | P | E | E | Q | E | F | V | N | N | N |
| <i>Rhesus</i>                 | E | Q | Q | S | H | L | S | S | I | V | T | P | E | E | Q | E | F | V | N | N | N |
| <i>Callithrix jacchus</i>     | E | Q | Q | S | H | L | S | S | I | V | T | P | E | E | Q | T | L | S | T | E | R |
| <i>Sus scrofa</i>             | E | Q | Q | S | H | L | S | S | I | V | T | P | E | E | Q | E | F | V | N | N | N |
| <i>Canis lupus familiaris</i> | E | Q | Q | S | H | L | S | S | I | V | T | P | E | E | Q | E | F | V | N | N | N |
| <i>Equus caballus</i>         | E | Q | Q | S | H | L | S | S | I | V | T | P | E | E | Q | E | F | V | N | N | N |
| <i>Ailuropoda melanoleuca</i> | E | Q | Q | A | H | L | S | S | I | V | T | P | E | E | Q | E | F | V | N | N | N |
| <i>Pongo abelii</i>           | E | Q | Q | S | H | L | S | S | I | V | T | P | E | E | Q | E | F | V | N | N | N |
| <i>Nomascus leucogenys</i>    | E | Q | Q | S | H | L | S | S | I | V | T | P | E | E | Q | E | F | V | N | N | N |
| <i>Macaca mulatta</i>         | E | Q | Q | S | H | L | S | S | I | V | T | P | E | E | Q | E | F | V | N | N | N |
| <i>Bos Taurus</i>             | E | Q | Q | S | H | L | S | S | I | V | T | P | E | E | Q | E | F | V | N | N | N |
