# Supplementary material for: Novel aggrecan variant, p. Gln2364Pro, causes severe familial nonsyndromic adult short stature and poor growth hormone response in Chinese children
Source: Springer Nature journal article supplement (doi:10.1186/s12881-018-0591-z), 2018-05-16

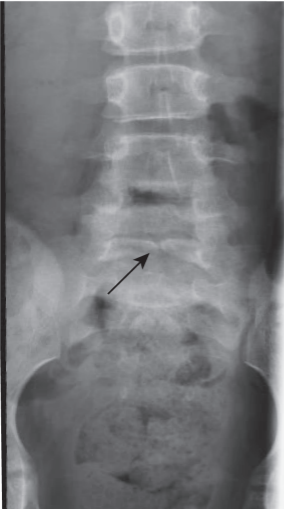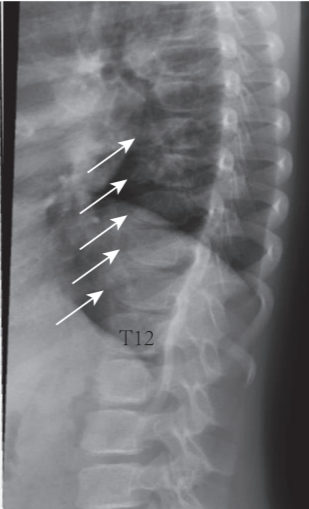

Supplement: MOESM2 [file 15769614]
